# Supplementary material
Source: publisher figshare collection journal article supplement (https://acs.figshare.com/ndownloader/files/12860306)
Supplement: Supplementary file 1 [file 12860306]

## *Supporting Information*

### Flux Synthesis of Layered Oxyhalide Bi<sub>4</sub>NbO<sub>8</sub>Cl Photocatalyst for Efficient Z-scheme Water Splitting Under Visible Light

*Kanta Ogawa,<sup>a</sup> Akinobu Nakada,<sup>a</sup> Hajime Suzuki,<sup>a,†</sup> Osamu Tomita,<sup>a</sup> Masanobu*

*Higashi,<sup>a</sup> Akinori Saeki,<sup>b</sup> Hiroshi Kageyama,<sup>a,c,\*</sup> Ryu Abe<sup>a,c,\*</sup>*

*a.* Department of Energy and Hydrocarbon Chemistry, Graduate School of Engineering,  
Kyoto University, Nishikyo-ku, Kyoto, 615-8510, Japan

*b.* Department of Applied Chemistry, Graduate School of Engineering, Osaka  
University, 2-1 Yamadaoka, Suita, Osaka 565-0871, Japan

*c.* JST-CREST, Japan Science and Technology Agency (JST), Kawaguchi, Saitama  
332-0012, Japan

\*Email: kage@scl.kyoto-u.ac.jp, ryu-abe@scl.kyoto-u.ac.jp

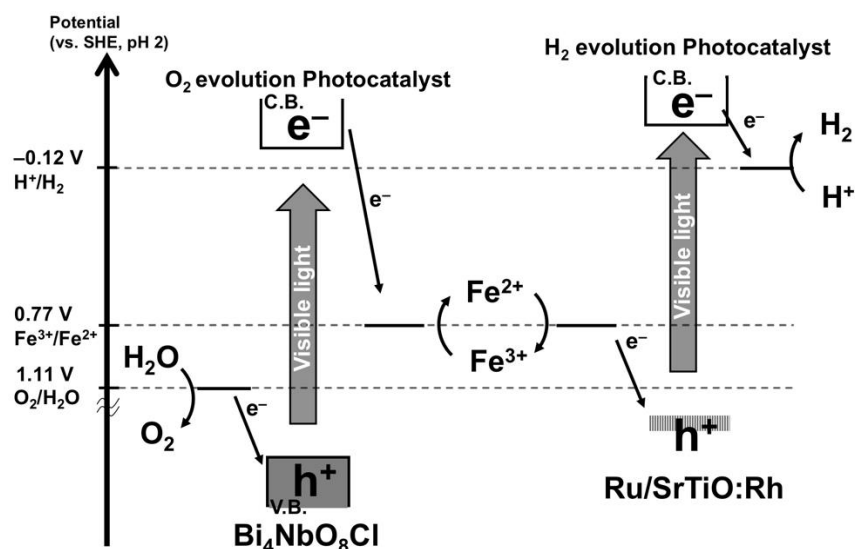

**Figure S1.** The schematic energy diagram of the Z-scheme water splitting system composed of  $\text{Bi}_4\text{NbO}_8\text{Cl}$ ,  $\text{Ru}/\text{SrTiO}_3\text{:Rh}$  and  $\text{Fe}^{3+}/\text{Fe}^{2+}$  redox.

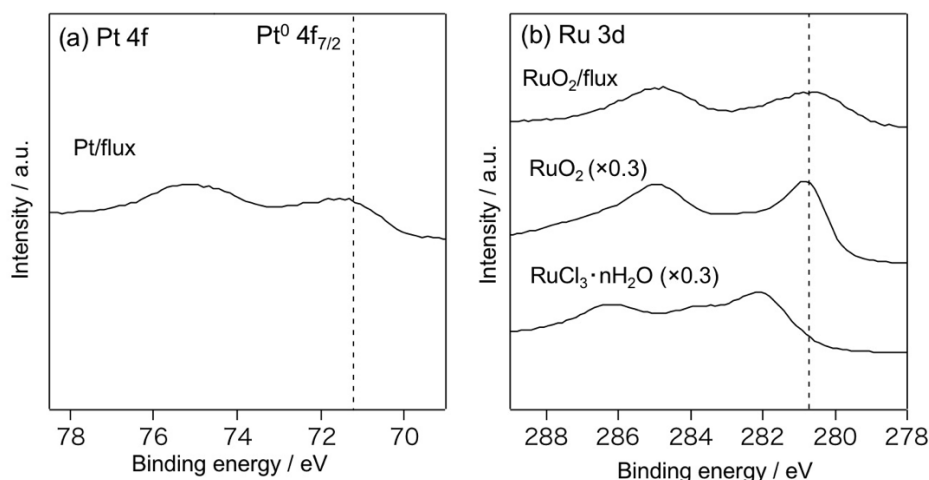

**Figure S2.** XP spectra of (a) Pt 4f and (b) Ru 3d region of Pt or Ru species loaded  $\text{Bi}_4\text{NbO}_8\text{Cl}$  samples prepared via the flux method ( $\text{CsCl}/\text{NaCl}$  flux at  $650^\circ\text{C}$ ), along with those of commercial  $\text{RuO}_2$  (Wako Pure Chemical Industries, Ltd.) and  $\text{RuCl}_3 \cdot n\text{H}_2\text{O}$  (Wako Pure Chemical Industries, Ltd) as references for comparison. Each cocatalyst was loaded via impregnation followed by heating under  $\text{H}_2$  flow ( $20\text{ mL min}^{-1}$ ) at  $150^\circ\text{C}$  for Pt or Ar flow ( $20\text{ mL min}^{-1}$ ) at  $450^\circ\text{C}$  for  $\text{RuO}_2$ . The binding energy of  $\text{Pt}^0$  was referred to a reference hand book.<sup>1</sup>

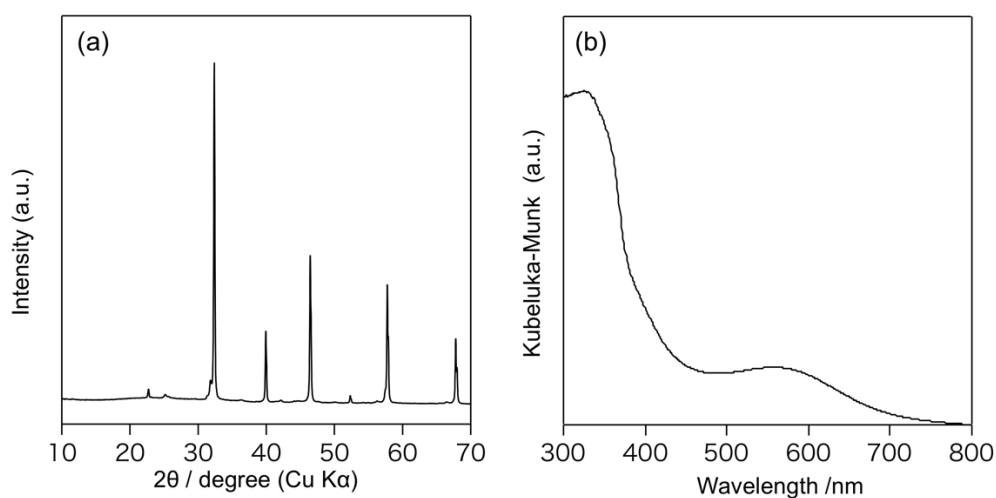

**Figure S3.** (a) XRD pattern and (b) DRS of as-prepared  $\text{SrTiO}_3\text{:Rh}$ .

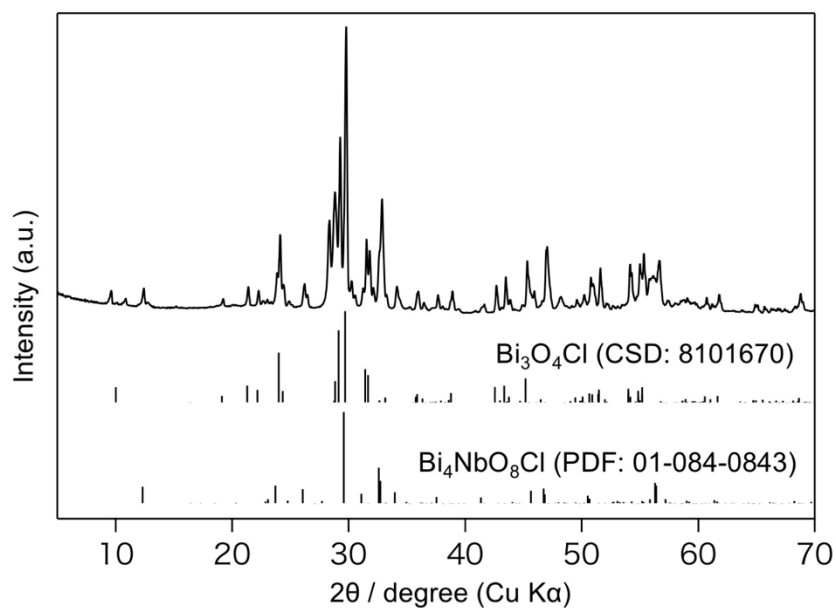

**Figure S4.** XRD patterns of  $\text{Bi}_4\text{NbO}_8\text{Cl}$  prepared by calcination of the mixture of the materials in air at 650 °C without any flux.

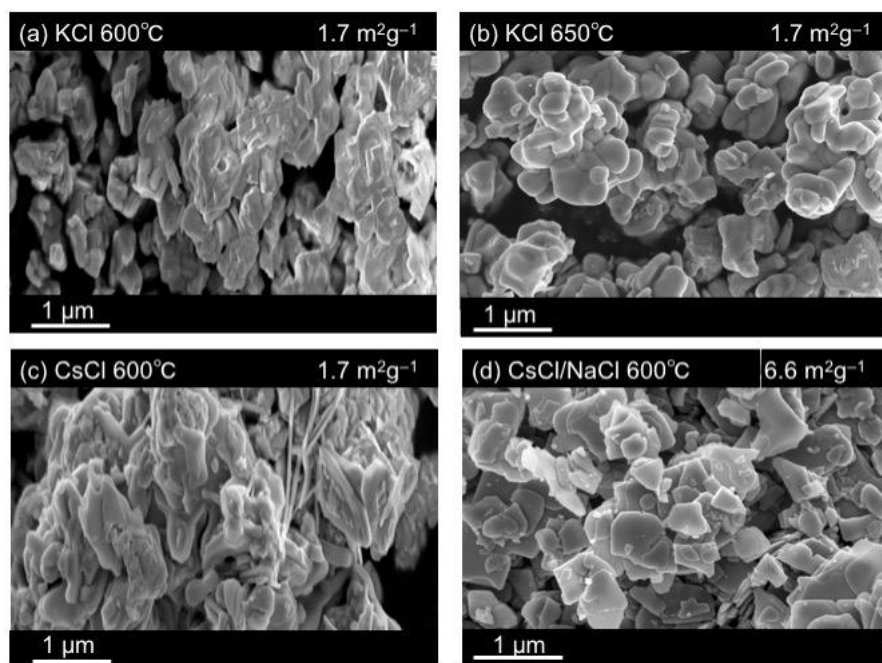

**Figure S5.** SEM images of  $\text{Bi}_4\text{NbO}_8\text{Cl}$  prepared via the flux method (a,b) with KCl at 600 and 650 °C; (c) with CsCl at 600 °C; (d) with CsCl/NaCl at 600 °C.

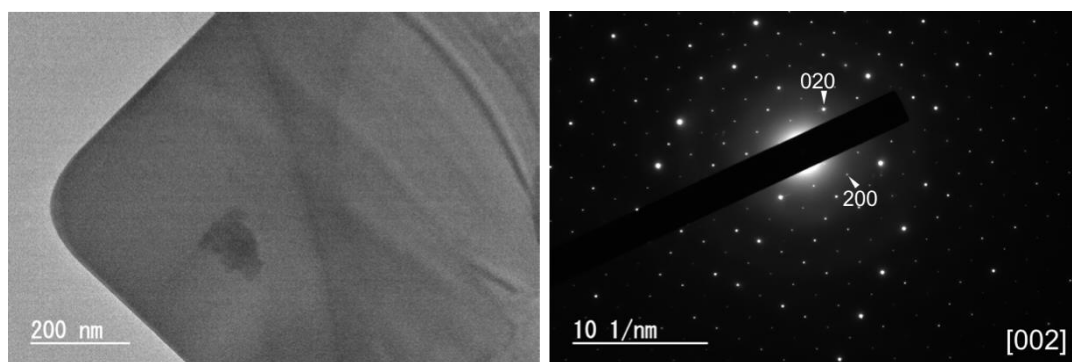

**Figure S6.** TEM image and electron diffraction patterns of  $\text{Bi}_4\text{NbO}_8\text{Cl}$  prepared via the flux method (CsCl/NaCl flux at 650 °C).

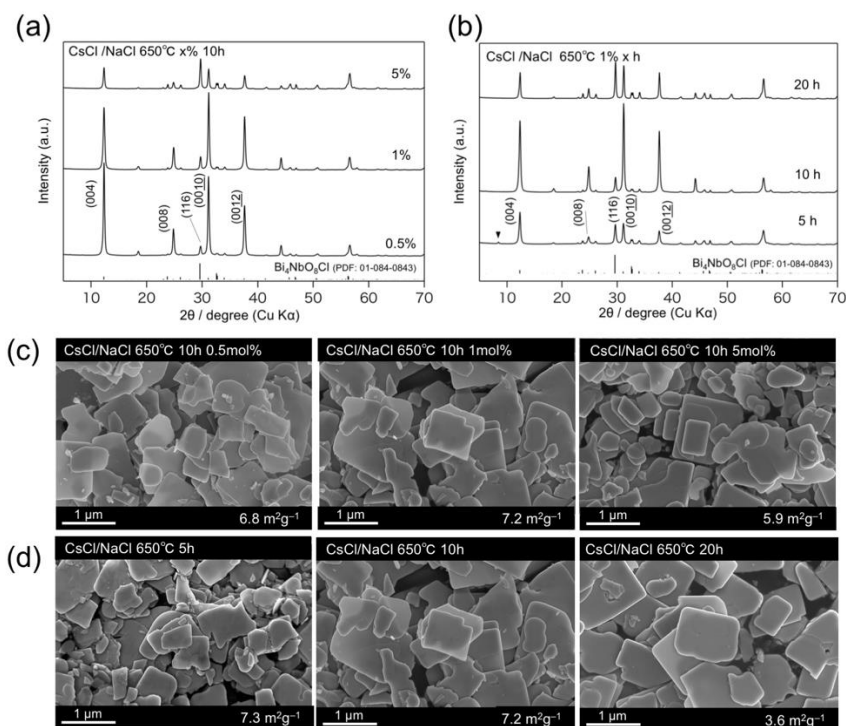

**Figure S7.** (a,b) XRD patterns and (c,d) SEM images of  $\text{Bi}_4\text{NbO}_8\text{Cl}$  prepared with  $\text{CsCl}/\text{NaCl}$  flux at various solute concentrations and calcination times.

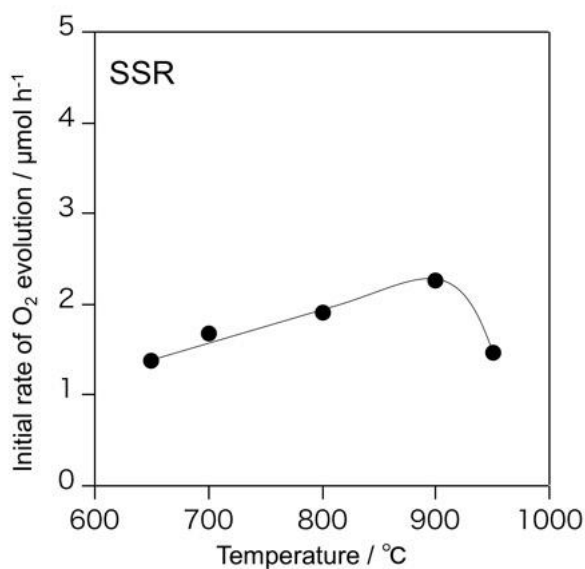

**Figure S8.** Initial rates of  $\text{O}_2$  evolution over  $\text{Bi}_4\text{NbO}_8\text{Cl}$  samples prepared at various temperature (650 ~ 950  $^{\circ}\text{C}$ ) via the solid-state reaction method in an aqueous  $\text{FeCl}_3$  solution (8 mM, 100 mL) under visible light irradiation ( $\lambda > 400$  nm).

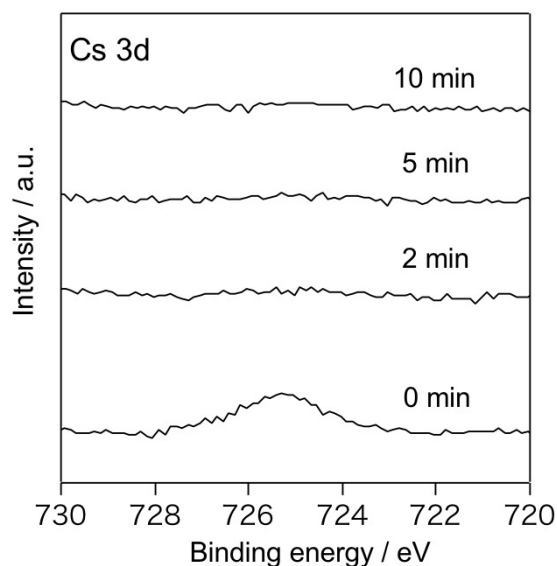

**Figure S9.** XP spectra of Cs 3d region of the flux sample before and after Ar sputtering (2, 5, 10 min). The binding energies were referenced to the Au 4f<sub>7/2</sub> level of deposited Au metal.

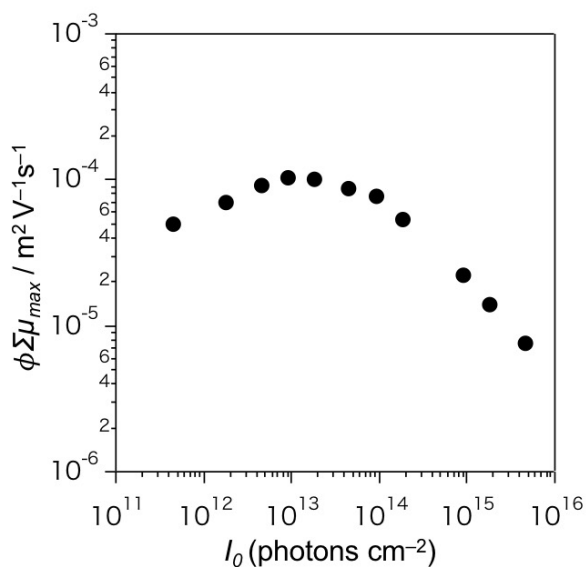

**Figure S10.** Dependence of  $\phi \Sigma \mu_{\max}$  on the incident laser intensity ( $I_0$ ) of the flux sample. The initial increase of  $\phi \Sigma \mu_{\max}$  with increasing  $I_0$  is due to a trap filling effect (an increase and saturation of  $\Sigma \mu$ ), while the gradual decrease at high  $I_0$  is rationalized by a high order deactivation process such as exciton–exciton annihilation, exciton–carrier annihilation, and charge recombination, which occur within the time resolution.<sup>2,3</sup>

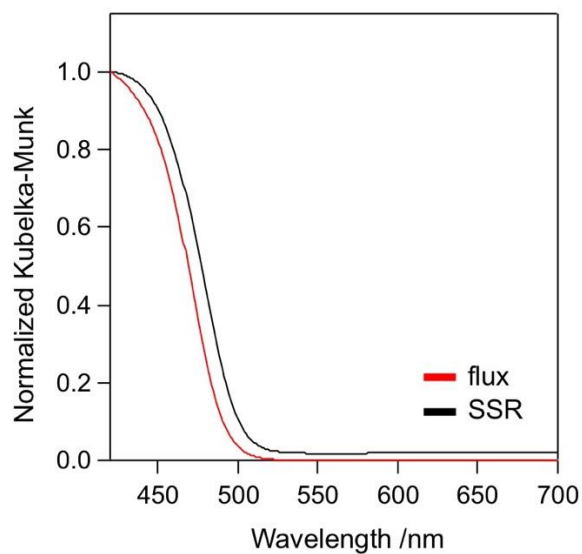

**Figure S11.** DRS of  $\text{Bi}_4\text{NbO}_8\text{Cl}$  samples prepared via the flux method (CsCl/NaCl flux at 650 °C) and the solid-state reaction method.

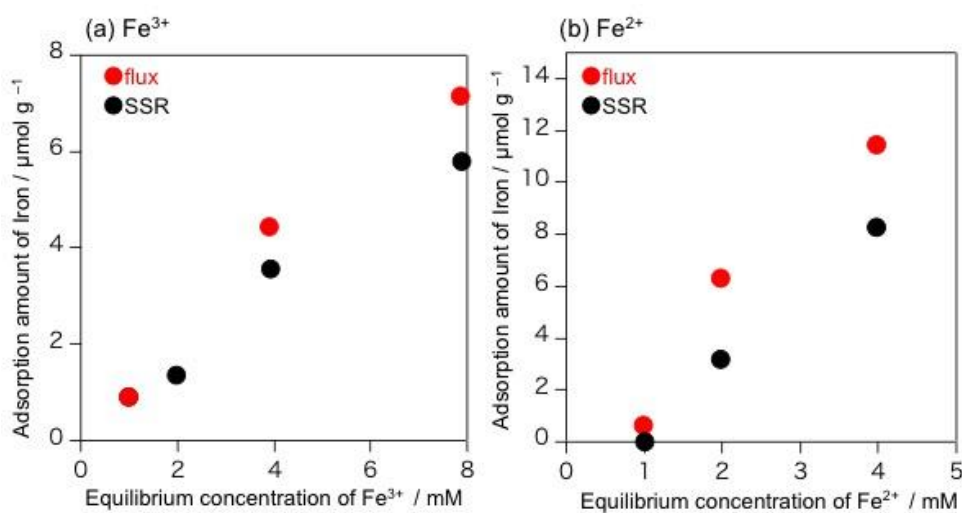

**Figure S12.** Adsorption properties of (a)  $\text{Fe}^{3+}$  and (b)  $\text{Fe}^{2+}$  ions on the  $\text{Bi}_4\text{NbO}_8\text{Cl}$  samples prepared via the flux method (CsCl/NaCl flux at 650 °C) and the solid-state reaction method.

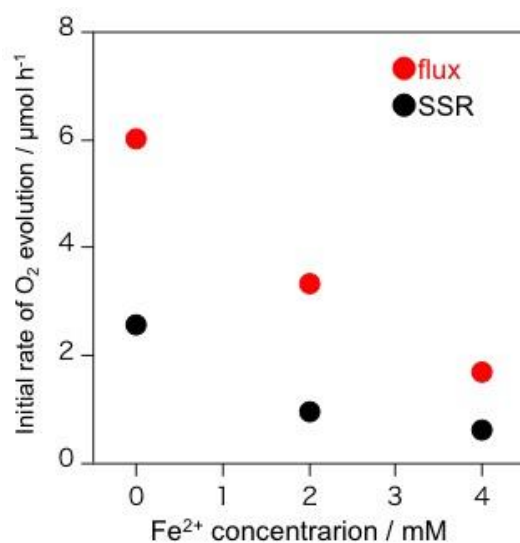

**Figure S13.** Initial rates of O<sub>2</sub> evolution over Bi<sub>4</sub>NbO<sub>8</sub>Cl samples prepared via the flux method (CsCl/NaCl flux at 650 °C) and the solid-state reaction method in a solution containing different concentrations of Fe<sup>2+</sup> (0 ~ 4 mM) and a fixed concentration of Fe<sup>3+</sup> (8 mM, 100 mL) under visible light irradiation ( $\lambda > 400$  nm).

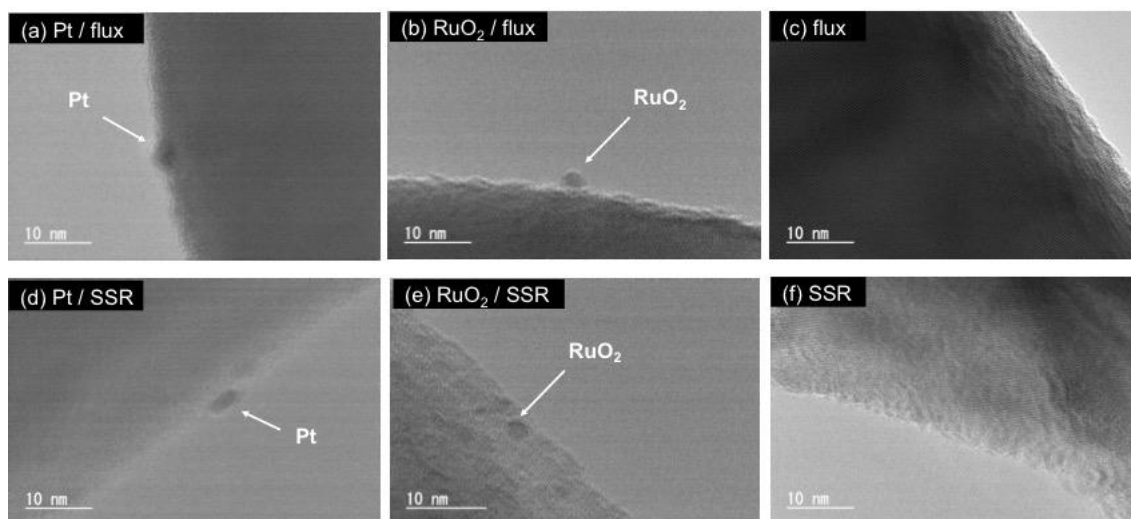

**Figure S14.** TEM images of (a,d) Pt- or (b,e) RuO<sub>2</sub>-loaded Bi<sub>4</sub>NbO<sub>8</sub>Cl, along with (c,f) unmodified ones. The Bi<sub>4</sub>NbO<sub>8</sub>Cl samples prepared via (a-c) the flux method (CsCl/NaCl flux at 650 °C) and (d-f) the solid-state reaction method.



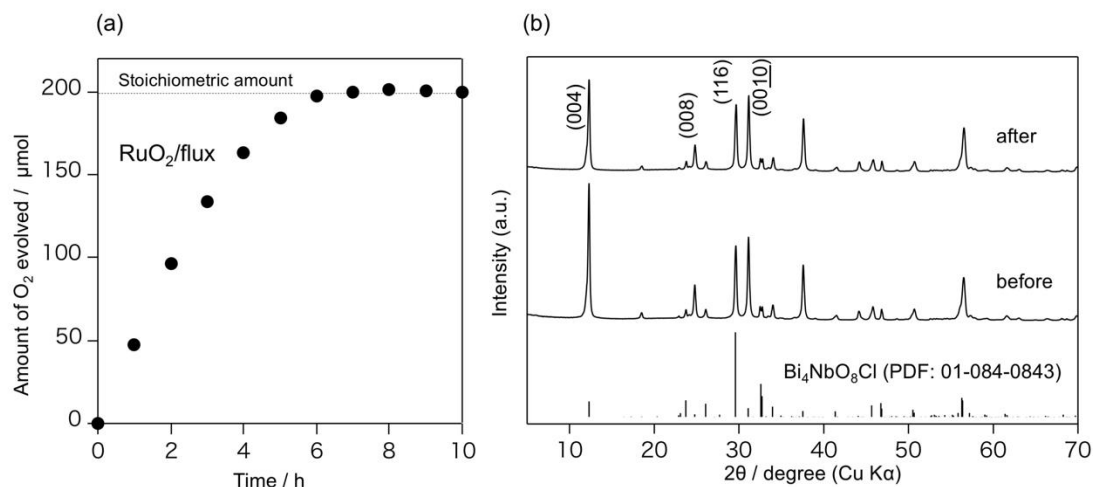

**Figure S15.** (a) Time course of O<sub>2</sub> evolution over a RuO<sub>2</sub>-loaded Bi<sub>4</sub>NbO<sub>8</sub>Cl sample prepared via the flux method (CsCl/NaCl flux at 650 °C) in an aqueous FeCl<sub>3</sub> solution (8 mM, 100 mL) under visible light irradiation ( $\lambda > 400$  nm). (b) XRD patterns of the RuO<sub>2</sub>-loaded Bi<sub>4</sub>NbO<sub>8</sub>Cl before and after the photocatalytic reaction.

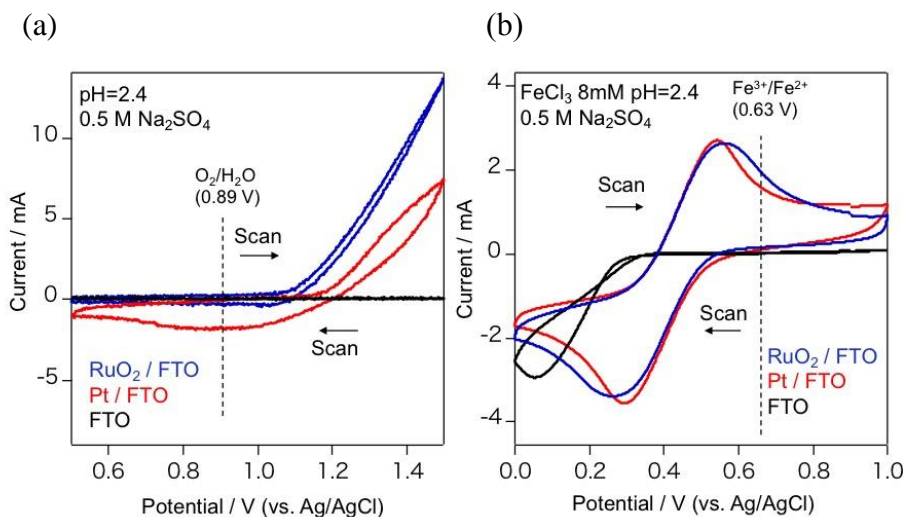

**Figure S16.** CV profiles of FTO substrates loaded with Pt or RuO<sub>2</sub> in 0.5 M aqueous Na<sub>2</sub>SO<sub>4</sub> solution (a) in the absence and (b) presence of Fe<sup>3+</sup> (8 mM, pH 2.4).

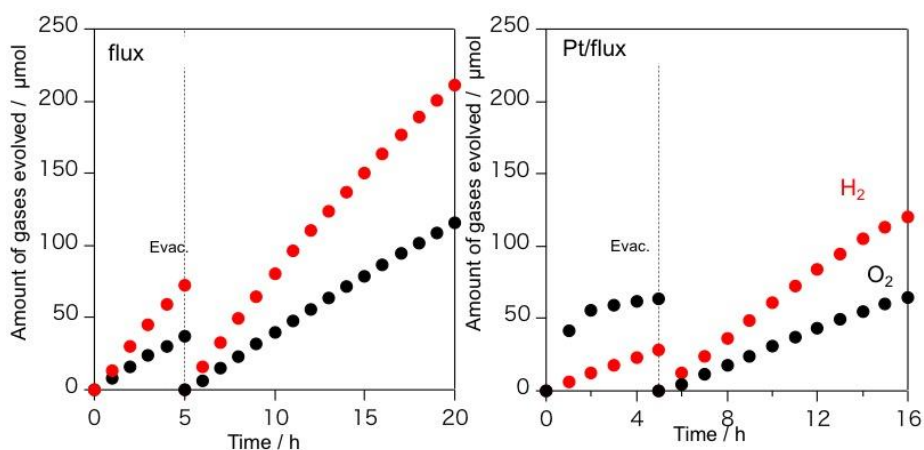

**Figure S17.** Time courses of H<sub>2</sub> and O<sub>2</sub> evolution over a mixture of bare or Pt-loaded Bi<sub>4</sub>NbO<sub>8</sub>Cl samples prepared via the flux method (CsCl/NaCl flux at 650 °C) (50 mg) and Ru/SrTiO<sub>3</sub>:Rh (50 mg) in FeCl<sub>3</sub> aqueous solution (2 mM, 100 mL) at pH 2.4 under visible light irradiation ( $\lambda > 400$  nm).

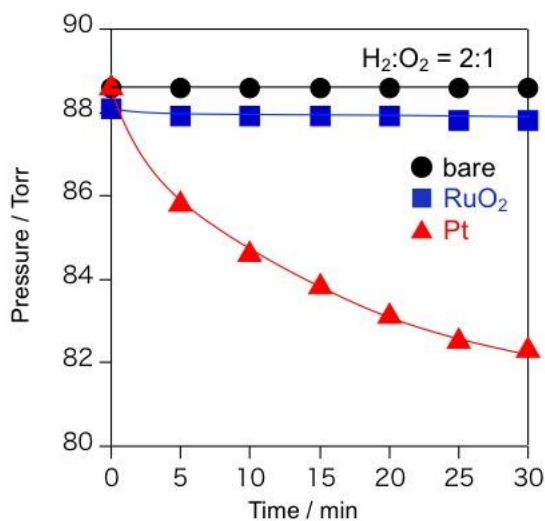

**Figure S18.** Water formation from H<sub>2</sub> and O<sub>2</sub> in the gas-phase reaction over Pt/flux, RuO<sub>2</sub>/flux and flux. A mixture of H<sub>2</sub> and air gases (H<sub>2</sub> : O<sub>2</sub> = 2 : 1) was introduced into a gas-circulating system with a Pyrex glass cell containing 20 mg of photocatalyst powder without water.

## References

- (1) Jhon, F. M.; William, F. S.; Kenneth, D. B. *Handbook of X-Rays Photoelectron Spectroscopy*; Jill, C., Ed.; Perkin-Elmer Corporation: Minnesota, 1992.
- (2) Kroeze, J. E.; Savenije, T. J.; Warman, J. M. Electrodeless Determination of the Trap Density, Decay Kinetics, and Charge Separation Efficiency of Dye-Sensitized Nanocrystalline TiO<sub>2</sub>. *J. Am. Chem. Soc.* **2004**, *126*, 7608–7618.
- (3) Saeki, A.; Yasutani, Y.; Oga, H.; Seki, S. Frequency-Modulated Gigahertz Complex Conductivity of TiO<sub>2</sub> Nanoparticles: Interplay of Free and Shallowly Trapped Electrons. *J. Phys. Chem. C* **2014**, *118*, 22561–22572.
